# Supplementary material for: Light irradiation induced aerobic oxidative deep-desulfurization of fuel in ionic liquid
Source: Royal Society of Chemistry journal article supplement (doi:10.1039/c5ra16079k), 2015-01-01
Supplement: c5ra16079k1.pdf [file c5ra16079k1.pdf]

Supplementary information

## **Light Irradiation Induced Aerobic Oxidative**

### **Deep-desulfurization of Fuel in Ionic Liquid**

Chao Wang,<sup>[a]</sup> Wenshuai Zhu,<sup>\*[b]</sup> Zhigang Chen,<sup>[a]</sup> Sheng Yin,<sup>[b]</sup> Peiwen Wu,<sup>[b]</sup>

Suhang Xun,<sup>[b]</sup> Wei Jiang,<sup>[c]</sup> Ming Zhang,<sup>[c]</sup> and Huaming Li<sup>\*[c]</sup>

<sup>[a]</sup> School of the Environment and Safety Engineering, Jiangsu University, 301 Xuefu Road, Zhenjiang 212013, P. R. China

<sup>[b]</sup> School of Chemistry and Chemical Engineering, Jiangsu University, 301 Xuefu Road, Zhenjiang 212013, P. R. China

<sup>[c]</sup> Institute for Energy Research, Jiangsu University, 301 Xuefu Road, Zhenjiang 212013, P. R. China

E-mail: zhuws@ujs.edu.cn (W. S. Zhu), lhm@ujs.edu.cn (H. M. Li)

**Scheme S1** The picture of reaction equipment

**Fig. S1** GC-MS of model oil and the oil phase in reaction system after reaction for few hours

**Fig. S2** The TIC of BT, DBT, 4,6-DMDBT dissolved in CCl<sub>4</sub>

**Fig. S3** GC-MS of the oxidation products of different substrate.

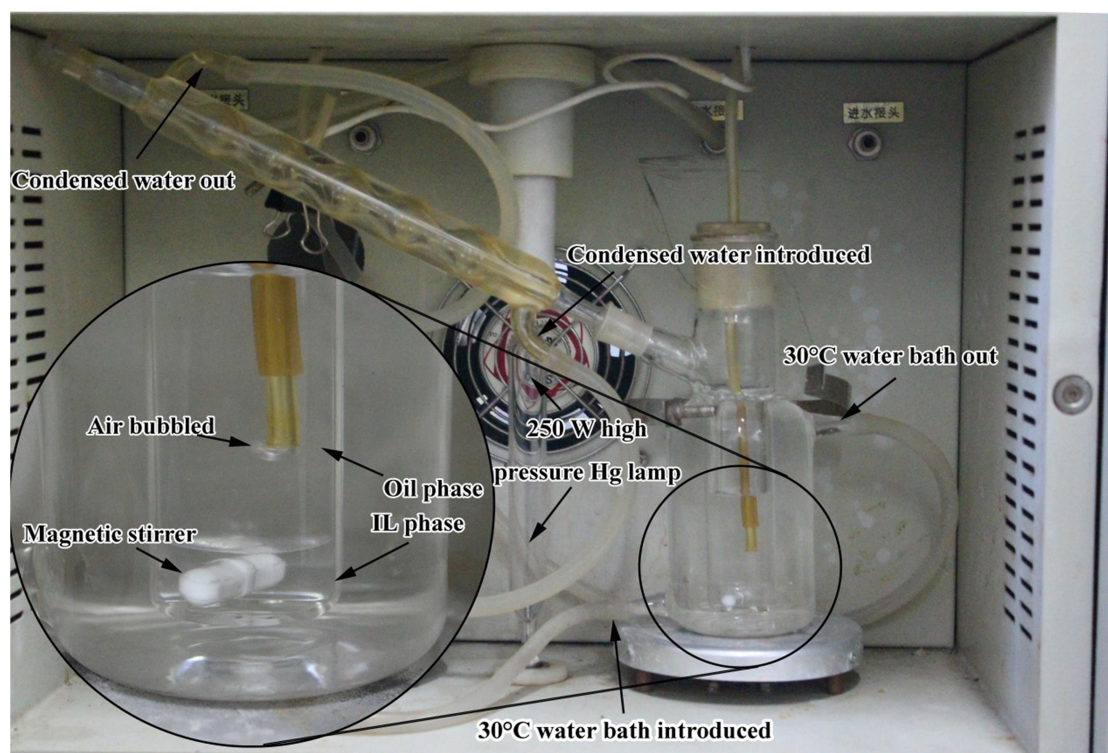

Scheme S1 The picture of reaction equipment

(a)

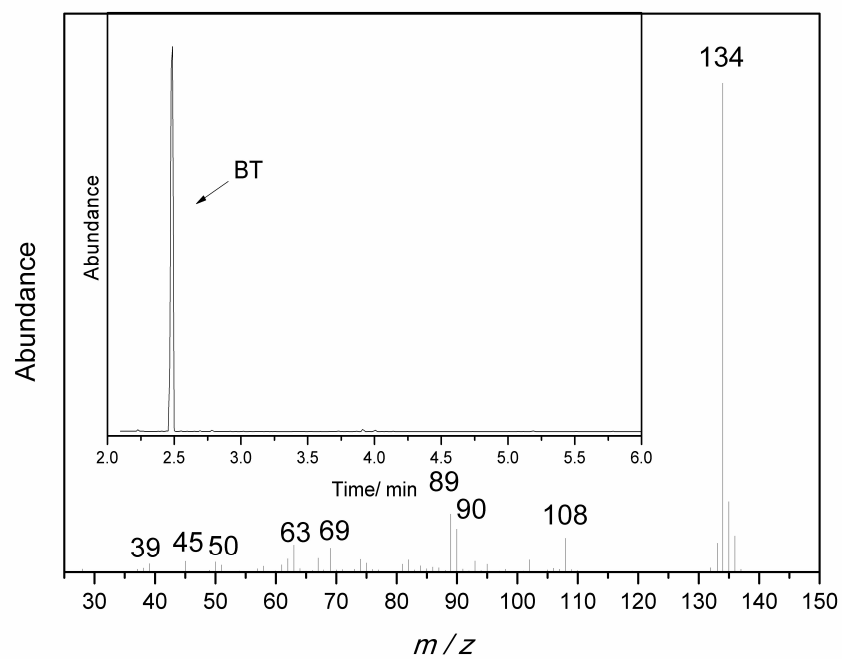

(b)

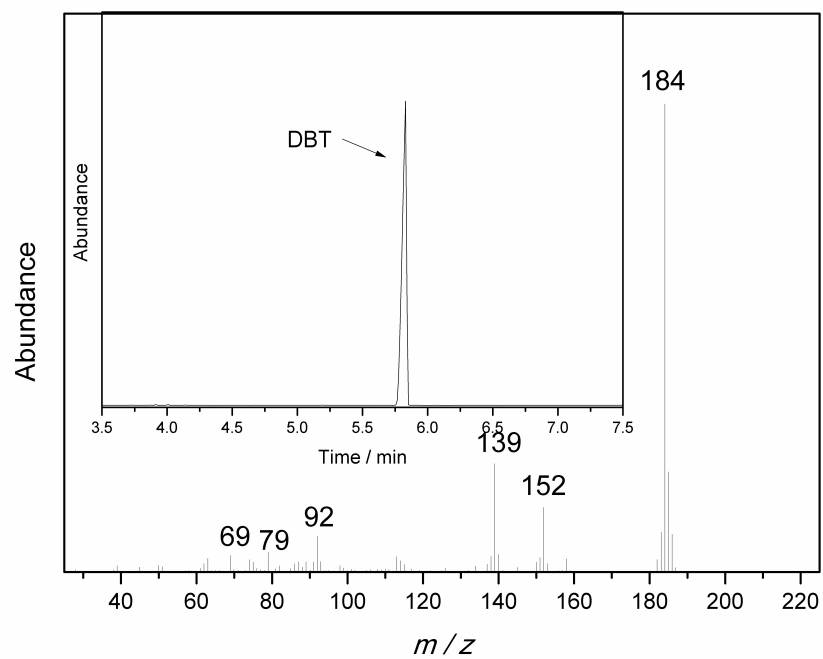

(c)

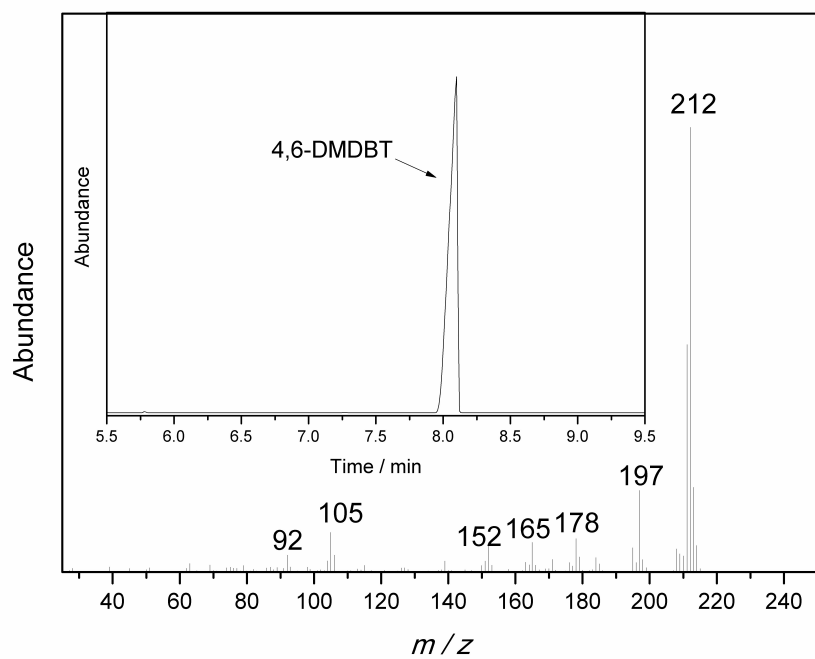

Fig. S1 The TIC of BT, DBT, 4,6-DMDBT dissolved in  $\text{CCl}_4$

(a)

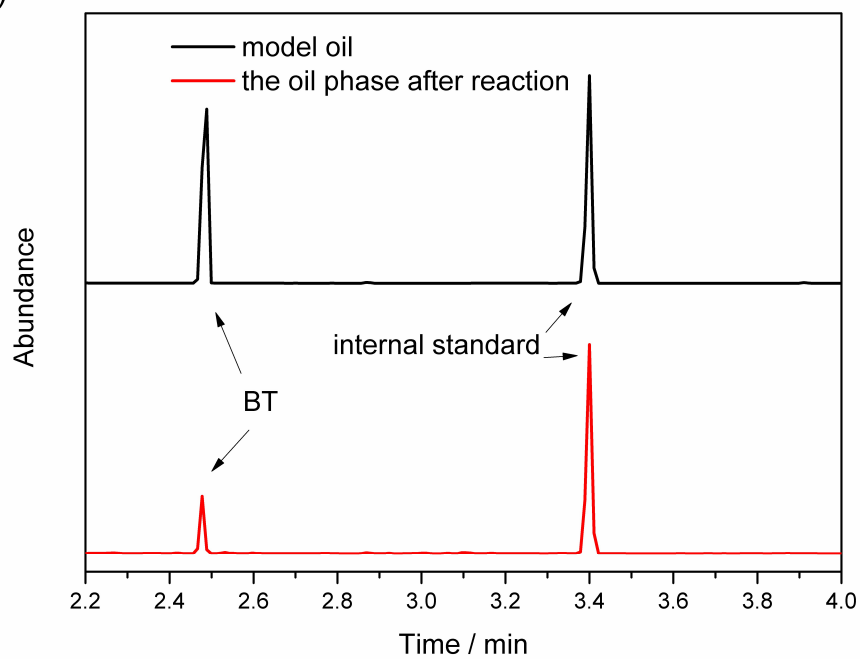

(b)

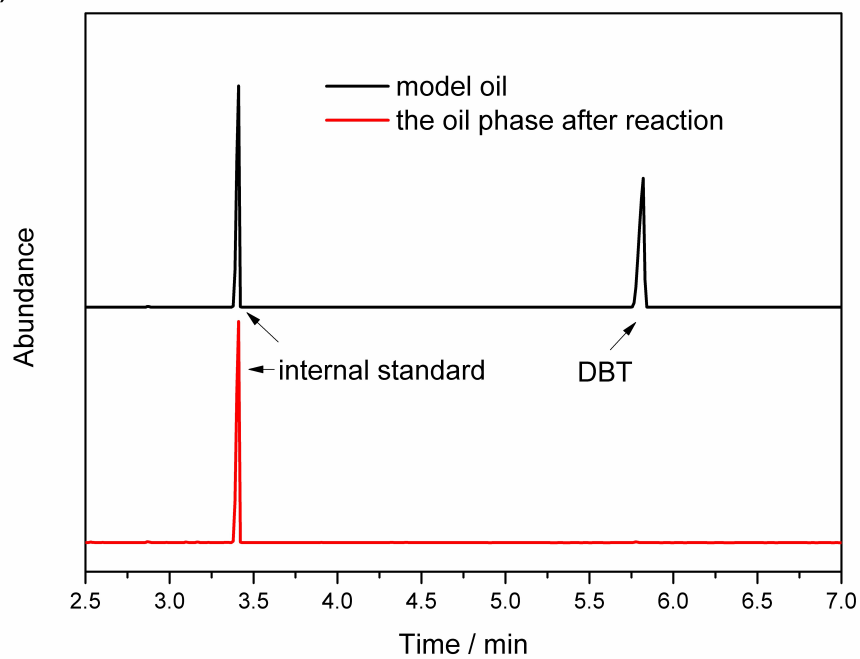

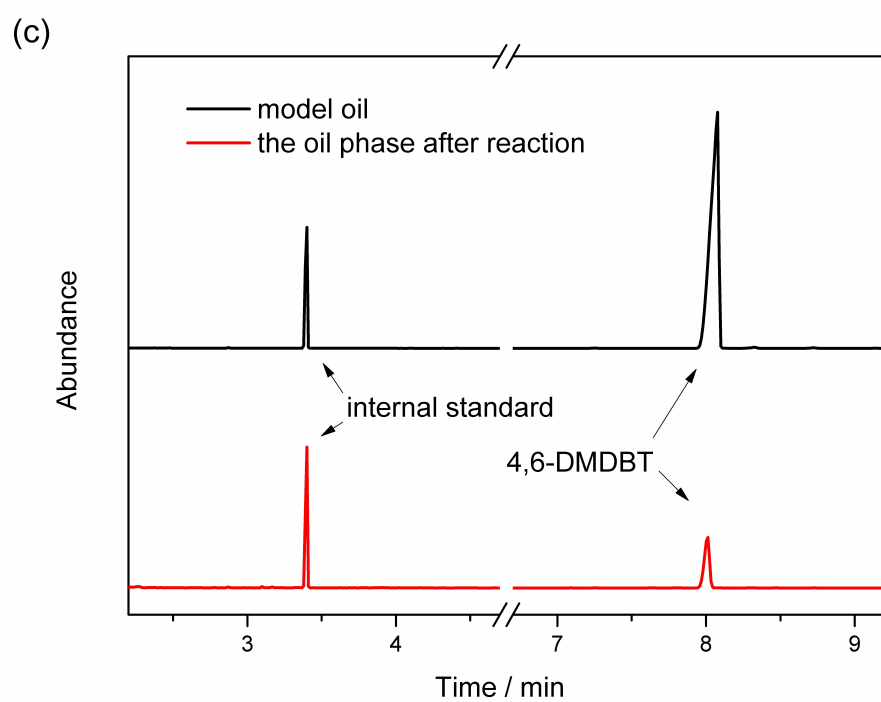

Fig. S2 TIC of model oil and the oxidized oil phase

(a)BT, (b)DBT, (c)4,6-DMDBT

(a)

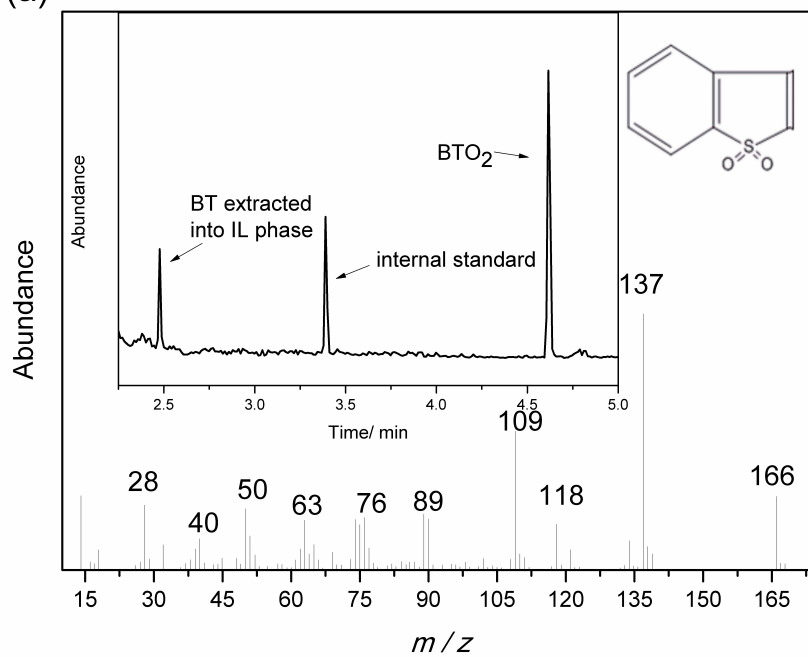

(b)

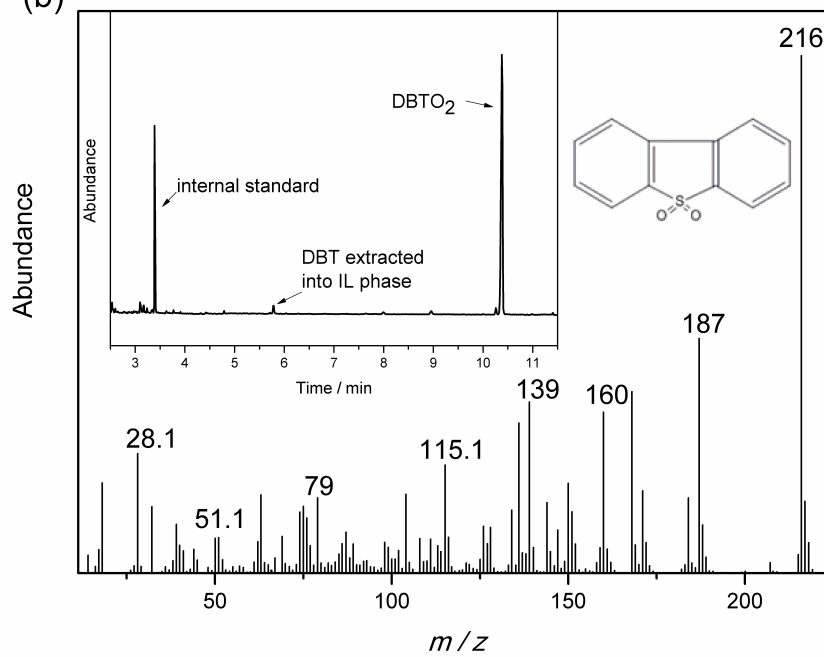

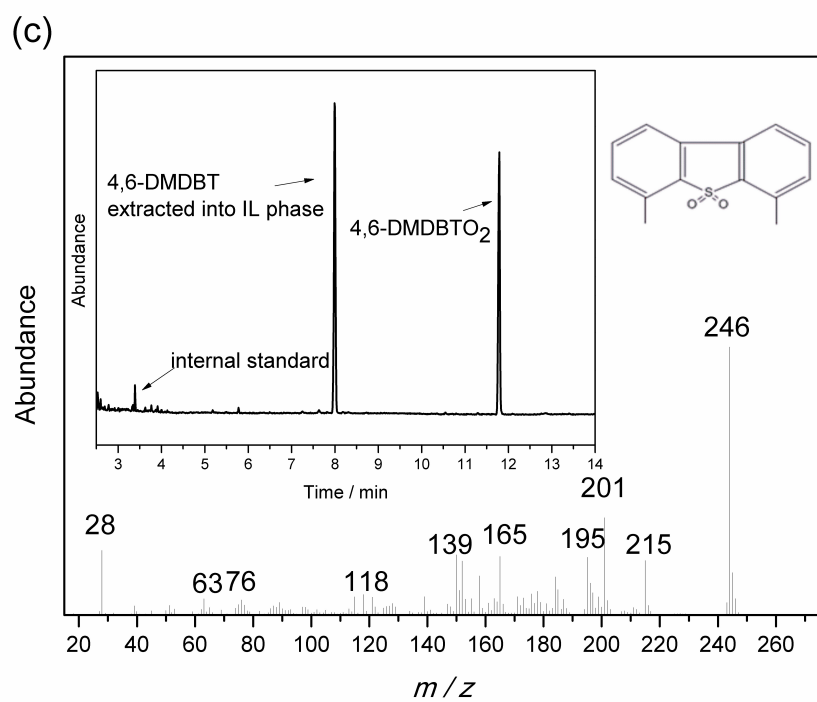

Fig. S3 GC-MS of the oxidation products of different substrate  
(a) DBTO<sub>2</sub>; (b) BTO<sub>2</sub>; (c) 4,6-DMDBTO<sub>2</sub>
